# Supplementary material for: Healthy, Inclusive and Sustainable Catering in Secondary Schools—An Analysis of a Transformation Process with Multiple Tensions
Source: MDPI journal article supplement (doi:10.3390/ijerph21030370), 2024-03-20
Supplement: s1 [file s1]

## Supplementary Table S1 Survey Form. Healthy, Inclusive and Sustainable Catering in Secondary Schools

|                                                                                |                                                                                         |                                                                                                                                                                                                                                                                                                                                                                                                                                                                                                                                                                                                                                                                                                                                                                                     |
|--------------------------------------------------------------------------------|-----------------------------------------------------------------------------------------|-------------------------------------------------------------------------------------------------------------------------------------------------------------------------------------------------------------------------------------------------------------------------------------------------------------------------------------------------------------------------------------------------------------------------------------------------------------------------------------------------------------------------------------------------------------------------------------------------------------------------------------------------------------------------------------------------------------------------------------------------------------------------------------|
| We would like to ask you a few introductory questions about yourself.          | 1.1 What year were you born?                                                            |                                                                                                                                                                                                                                                                                                                                                                                                                                                                                                                                                                                                                                                                                                                                                                                     |
|                                                                                | 1.2 What is your gender?                                                                | <input type="checkbox"/> female<br><input type="checkbox"/> male<br><input type="checkbox"/> diverse                                                                                                                                                                                                                                                                                                                                                                                                                                                                                                                                                                                                                                                                                |
|                                                                                | 1.3 What is your school?                                                                | Please select                                                                                                                                                                                                                                                                                                                                                                                                                                                                                                                                                                                                                                                                                                                                                                       |
|                                                                                | 1.4 What grade level are you in?                                                        | <input type="checkbox"/> 8<br><input type="checkbox"/> 9<br><input type="checkbox"/> 10                                                                                                                                                                                                                                                                                                                                                                                                                                                                                                                                                                                                                                                                                             |
| 2. Now we would like to ask you a few questions about the food at your school. | 2.1 How often do you eat warm lunch at school?                                          | <input type="checkbox"/> Daily<br><input type="checkbox"/> 3-4 times per week<br><input type="checkbox"/> 1-2 times per week<br><input type="checkbox"/> Less often<br><input type="checkbox"/> Never<br><input type="checkbox"/> Not available                                                                                                                                                                                                                                                                                                                                                                                                                                                                                                                                     |
|                                                                                | 2.2 Why do you never or rarely eat at school? Please select all the answers that apply. | <input type="checkbox"/> Because I prefer to eat dinner at home.<br><input type="checkbox"/> Because I do not like the taste of the food.<br><input type="checkbox"/> Because the price is too high for me and my parents.<br><input type="checkbox"/> Because the lunchbreak is too short.<br><input type="checkbox"/> Because I prefer to eat with my friends outside of school.<br><input type="checkbox"/> Because I prefer to buy something from the kiosk/vending machine.<br><input type="checkbox"/> Because the lunchroom is not appealing<br><input type="checkbox"/> Because of little variety in food/small menu.<br><input type="checkbox"/> Because the food contains too many calories and fat.<br><input type="checkbox"/> Because my friends do not eat at school. |

|  |                                                                                                                                                             |                                                                                                                                                                                                                                                                                                                                                                                                                                                                                     |                          |                          |                          |                          |                          |
|--|-------------------------------------------------------------------------------------------------------------------------------------------------------------|-------------------------------------------------------------------------------------------------------------------------------------------------------------------------------------------------------------------------------------------------------------------------------------------------------------------------------------------------------------------------------------------------------------------------------------------------------------------------------------|--------------------------|--------------------------|--------------------------|--------------------------|--------------------------|
|  |                                                                                                                                                             | <input type="checkbox"/> Because I bring my food from home.<br><input type="checkbox"/> Because I feel overly supervised by teachers.<br><input type="checkbox"/> Because the food does not fit into my personal diet.<br><input type="checkbox"/> Because I am not particularly hungry at noon.<br><input type="checkbox"/> Because the portion size is too small<br><input type="checkbox"/> Because the portion size is too large<br><input type="checkbox"/> Other reasons: ... |                          |                          |                          |                          |                          |
|  | 2.3 Which of the following food options are available in addition to or instead of the warm lunch at your school? Please select all the answers that apply. | <input type="checkbox"/> Kiosk<br><input type="checkbox"/> After-lunch offer in the canteen<br><input type="checkbox"/> Vending machines<br><input type="checkbox"/> No other food options available                                                                                                                                                                                                                                                                                |                          |                          |                          |                          |                          |
|  | 2.4 How often do you get small snacks there?                                                                                                                | <input type="checkbox"/> Daily<br><input type="checkbox"/> 3-4 times per week<br><input type="checkbox"/> 1-2 times per week<br><input type="checkbox"/> Less often<br><input type="checkbox"/> Never                                                                                                                                                                                                                                                                               |                          |                          |                          |                          |                          |
|  | 2.5 What exactly are you buying?                                                                                                                            |                                                                                                                                                                                                                                                                                                                                                                                                                                                                                     | Daily                    | 3-4 times per week       | 1-2 times per week       | Less often               | Never                    |
|  |                                                                                                                                                             | Sandwiches/bread with sausage or cheese                                                                                                                                                                                                                                                                                                                                                                                                                                             | <input type="checkbox"/> |
|  | Sweet pastries (croissants, donuts, or muffins)                                                                                                             | <input type="checkbox"/>                                                                                                                                                                                                                                                                                                                                                                                                                                                            | <input type="checkbox"/> | <input type="checkbox"/> | <input type="checkbox"/> | <input type="checkbox"/> |                          |
|  | Sweet or salty snacks                                                                                                                                       | <input type="checkbox"/>                                                                                                                                                                                                                                                                                                                                                                                                                                                            | <input type="checkbox"/> | <input type="checkbox"/> | <input type="checkbox"/> | <input type="checkbox"/> |                          |
|  | Dairy products such as yoghurt, quark                                                                                                                       | <input type="checkbox"/>                                                                                                                                                                                                                                                                                                                                                                                                                                                            | <input type="checkbox"/> | <input type="checkbox"/> | <input type="checkbox"/> | <input type="checkbox"/> |                          |

|                                                                                      |                                                                                        |                                                                                                                                                                                                    |                          |                          |                          |                          |                          |
|--------------------------------------------------------------------------------------|----------------------------------------------------------------------------------------|----------------------------------------------------------------------------------------------------------------------------------------------------------------------------------------------------|--------------------------|--------------------------|--------------------------|--------------------------|--------------------------|
|                                                                                      |                                                                                        | warm snacks such as schnitzel, meatballs, pizza slices, hot sausages                                                                                                                               | <input type="checkbox"/> |
|                                                                                      |                                                                                        | Fruit or fruit salad                                                                                                                                                                               | <input type="checkbox"/> |
|                                                                                      |                                                                                        | Raw vegetables                                                                                                                                                                                     | <input type="checkbox"/> |
|                                                                                      |                                                                                        | Sweet drinks (Cola, lemonade, energy drinks or ice tea)                                                                                                                                            | <input type="checkbox"/> |
|                                                                                      | 2.6 How often do you eat nothing at all for lunch?                                     | <input type="checkbox"/> Daily<br><input type="checkbox"/> 3-4 times per week<br><input type="checkbox"/> 1-2 times per week<br><input type="checkbox"/> Less often <input type="checkbox"/> Never |                          |                          |                          |                          |                          |
| 3. Jetzt würden wir gerne noch etwas über den Ablauf des Schulmittagessens erfahren. | 3.1. Which of the following statements apply to you eating school lunch?               |                                                                                                                                                                                                    | Agree                    | Rather agree             | Rather disagree          | Disagree                 |                          |
|                                                                                      |                                                                                        | We eat lunch together with the class                                                                                                                                                               | <input type="checkbox"/> | <input type="checkbox"/> | <input type="checkbox"/> | <input type="checkbox"/> |                          |
|                                                                                      |                                                                                        | I only eat lunch with my friends                                                                                                                                                                   | <input type="checkbox"/> | <input type="checkbox"/> | <input type="checkbox"/> | <input type="checkbox"/> |                          |
|                                                                                      |                                                                                        | The school lunch is an opportunity for me to talk to other pupils that I do not know so well.                                                                                                      | <input type="checkbox"/> | <input type="checkbox"/> | <input type="checkbox"/> | <input type="checkbox"/> |                          |
|                                                                                      | 3.2 Do pupils have to pre-order the food?                                              | <input type="checkbox"/> Yes<br><input type="checkbox"/> No<br><input type="checkbox"/> I do not know                                                                                              |                          |                          |                          |                          |                          |
|                                                                                      | 3.3. At your school, how long in advance do you usually have to place your food order? | <input type="checkbox"/> ____ Days<br><input type="checkbox"/> I do not know                                                                                                                       |                          |                          |                          |                          |                          |
|                                                                                      |                                                                                        |                                                                                                                                                                                                    |                          |                          |                          |                          |                          |

|                                                                                                 |                                                                           |                                                                                                                                                                                                                                                                           |                          |                          |                          |                          |                          |
|-------------------------------------------------------------------------------------------------|---------------------------------------------------------------------------|---------------------------------------------------------------------------------------------------------------------------------------------------------------------------------------------------------------------------------------------------------------------------|--------------------------|--------------------------|--------------------------|--------------------------|--------------------------|
|                                                                                                 | 3.4 What applies to the food service?                                     | <input type="checkbox"/> We are served a complete meal at the counter.<br><input type="checkbox"/> We can select at least some of the food components by ourselves<br><input type="checkbox"/> Food is served differently: ____<br><input type="checkbox"/> I do not know |                          |                          |                          |                          |                          |
|                                                                                                 | 3.5 How much time do you have for lunch at your school?                   | <input type="checkbox"/> Less than 20 minutes<br><input type="checkbox"/> 20-30 minutes<br><input type="checkbox"/> 31-45 minutes<br><input type="checkbox"/> 46-60 minutes<br><input type="checkbox"/> More than one hour                                                |                          |                          |                          |                          |                          |
| 4. In this section, we would like to know how you rate the lunch and what your preferences are. | 4.1 How satisfied are you with the following aspects of the school lunch? |                                                                                                                                                                                                                                                                           | 1 = not satisfied        | 2                        | 3                        | 4                        | 5 = very satisfied       |
|                                                                                                 |                                                                           | Taste                                                                                                                                                                                                                                                                     | <input type="checkbox"/> |
|                                                                                                 |                                                                           | Temperature                                                                                                                                                                                                                                                               | <input type="checkbox"/> |
|                                                                                                 |                                                                           | Food presentation                                                                                                                                                                                                                                                         | <input type="checkbox"/> |
|                                                                                                 |                                                                           | Menu                                                                                                                                                                                                                                                                      | <input type="checkbox"/> |
|                                                                                                 |                                                                           | Length of lunchbreak                                                                                                                                                                                                                                                      | <input type="checkbox"/> |
|                                                                                                 |                                                                           | Meal ordering system                                                                                                                                                                                                                                                      | <input type="checkbox"/> |
|                                                                                                 |                                                                           | Service workers                                                                                                                                                                                                                                                           | <input type="checkbox"/> |

|                       |                                                                                    |                                                  |                          |                          |                          |                          |                          |
|-----------------------|------------------------------------------------------------------------------------|--------------------------------------------------|--------------------------|--------------------------|--------------------------|--------------------------|--------------------------|
|                       | 4.2 How satisfied are you with the following aspects of the lunchroom?             |                                                  | 1 = not satisfied        | 2                        | 3                        | 4                        | 5 = very satisfied       |
|                       |                                                                                    | Noise level                                      | <input type="checkbox"/> |
|                       |                                                                                    | Available seating                                | <input type="checkbox"/> |
|                       |                                                                                    | Cleanliness                                      | <input type="checkbox"/> |
|                       |                                                                                    | Comfort                                          | <input type="checkbox"/> |
|                       | 4.3 How important is it to you that the school lunch offers the following aspects? |                                                  | 1 = Not important        | 2                        | 3                        | 4                        | 5 = Very important       |
|                       |                                                                                    | Organic food                                     | <input type="checkbox"/> |
|                       |                                                                                    | Healthy meals                                    | <input type="checkbox"/> |
|                       |                                                                                    | Faire trade products                             | <input type="checkbox"/> |
|                       |                                                                                    | Vegetarian dishes                                | <input type="checkbox"/> |
|                       |                                                                                    | Vegan dishes                                     | <input type="checkbox"/> |
|                       |                                                                                    | Regional food                                    | <input type="checkbox"/> |
|                       |                                                                                    | Information about the origins of the ingredients | <input type="checkbox"/> |
| Comfortable lunchroom | <input type="checkbox"/>                                                           | <input type="checkbox"/>                         | <input type="checkbox"/> | <input type="checkbox"/> | <input type="checkbox"/> |                          |                          |

|  |                                                                                          |                                                             |                          |                          |                          |                          |                          |
|--|------------------------------------------------------------------------------------------|-------------------------------------------------------------|--------------------------|--------------------------|--------------------------|--------------------------|--------------------------|
|  |                                                                                          | Opportunities to decide about the offered menu              | <input type="checkbox"/> |
|  |                                                                                          | Menu that considers the needs and preferences of all pupils | <input type="checkbox"/> |
|  |                                                                                          | The opportunity to eat at school without pre-ordering       | <input type="checkbox"/> |
|  | 4.4 Are you involved in the school lunch / menu planning?                                | <input type="checkbox"/> Yes<br><input type="checkbox"/> No |                          |                          |                          |                          |                          |
|  | 4.5. How are you involved in the school lunch / menu planning?                           |                                                             |                          |                          |                          |                          |                          |
|  | 4.6 Would you be interested in the following activities and participation opportunities? |                                                             | 1 = Not interested       | 2                        | 3                        | 4                        | 5 = Very interested      |
|  |                                                                                          | Decorating the lunchroom                                    | <input type="checkbox"/> |
|  |                                                                                          | Giving feedback to the caterer                              | <input type="checkbox"/> |
|  |                                                                                          | Voting for favorite meals                                   | <input type="checkbox"/> |
|  |                                                                                          | Test-tasting activities                                     | <input type="checkbox"/> |

|                                                                      |                                                                                       |                                                                                                                                                                                                                                                                                                                                                                                                                                                                                                                 |                          |                          |                          |                          |                          |                          |
|----------------------------------------------------------------------|---------------------------------------------------------------------------------------|-----------------------------------------------------------------------------------------------------------------------------------------------------------------------------------------------------------------------------------------------------------------------------------------------------------------------------------------------------------------------------------------------------------------------------------------------------------------------------------------------------------------|--------------------------|--------------------------|--------------------------|--------------------------|--------------------------|--------------------------|
|                                                                      |                                                                                       | Workshops on healthy and sustainable food                                                                                                                                                                                                                                                                                                                                                                                                                                                                       | <input type="checkbox"/> |                          |
|                                                                      |                                                                                       | Participating in official school committees)                                                                                                                                                                                                                                                                                                                                                                                                                                                                    | <input type="checkbox"/> |                          |
|                                                                      |                                                                                       | Involvement in a company run by pupils                                                                                                                                                                                                                                                                                                                                                                                                                                                                          | <input type="checkbox"/> |                          |
|                                                                      | 4.7 What special requests or suggestions do you have for lunch at your school?        |                                                                                                                                                                                                                                                                                                                                                                                                                                                                                                                 |                          |                          |                          |                          |                          |                          |
| 5. We would like to know something about your general eating habits. | 5.1 Are you currently following a special diet? Please select all answers that apply. | <input type="checkbox"/> Low-fat and low-calorie diet<br><input type="checkbox"/> Low sugar diet<br><input type="checkbox"/> Vegan diet<br><input type="checkbox"/> Vegetarian diet<br><input type="checkbox"/> Consumption of fish but no meat<br><input type="checkbox"/> Lactose-free diet<br><input type="checkbox"/> Gluten-free diet<br><input type="checkbox"/> Halal diet<br><input type="checkbox"/> Kosher diet<br><input type="checkbox"/> No special diet<br><input type="checkbox"/> Another diet: |                          |                          |                          |                          |                          |                          |
|                                                                      | 5.2 On how many days a week do you usually eat the following food at home?            |                                                                                                                                                                                                                                                                                                                                                                                                                                                                                                                 | Daily (7 days)           | Almost daily (5-6 days)  | (3-4 days)               | (1-2 days)               | Less than 1-2 days       | Never                    |
|                                                                      |                                                                                       | Freshly cooked food                                                                                                                                                                                                                                                                                                                                                                                                                                                                                             | <input type="checkbox"/> |
|                                                                      |                                                                                       | Fast Food (e.g. Burger, Pizza, French fries)                                                                                                                                                                                                                                                                                                                                                                                                                                                                    | <input type="checkbox"/> |

|                                                                                                                     |                                                                                                                                      |                                                                             |                          |                          |                          |                          |                          |                          |
|---------------------------------------------------------------------------------------------------------------------|--------------------------------------------------------------------------------------------------------------------------------------|-----------------------------------------------------------------------------|--------------------------|--------------------------|--------------------------|--------------------------|--------------------------|--------------------------|
|                                                                                                                     |                                                                                                                                      | Vegetables or salad (no potatoes), Fruit                                    | <input type="checkbox"/> |
|                                                                                                                     |                                                                                                                                      | Sweets or cake                                                              | <input type="checkbox"/> |
|                                                                                                                     |                                                                                                                                      | Salty snacks (e.g. potato or bread chips, salted pretzels or cheese sticks) | <input type="checkbox"/> |
|                                                                                                                     |                                                                                                                                      | Sweet drinks (Cola, lemonade, energy drinks or ice tea)                     | <input type="checkbox"/> |
|                                                                                                                     |                                                                                                                                      | Wholegrain products (e.g. wholegrain bread, pasta, or rice)                 | <input type="checkbox"/> |
| 6. At the end of the survey, we would like to find out a little more about you, your school and family environment. | 6.1 Please read the following statements carefully. To what extent do they apply on a scale of 1 (Does not apply) to 5 (Does apply)? |                                                                             | 1 = Does not apply       | 2                        | 3                        | 4                        | 5 = Does apply           |                          |
|                                                                                                                     |                                                                                                                                      | I like going to schools.                                                    | <input type="checkbox"/> |                          |
|                                                                                                                     |                                                                                                                                      | I feel comfortable in my class.                                             | <input type="checkbox"/> |                          |
|                                                                                                                     |                                                                                                                                      | We have a good class community.                                             | <input type="checkbox"/> |                          |



|  |                                                                                                                                                                        |                                                             |                          |                          |                          |                          |                          |
|--|------------------------------------------------------------------------------------------------------------------------------------------------------------------------|-------------------------------------------------------------|--------------------------|--------------------------|--------------------------|--------------------------|--------------------------|
|  |                                                                                                                                                                        | I have several good friends in my class.                    | <input type="checkbox"/> |
|  |                                                                                                                                                                        | I often meet up with some of my classmates after school.    | <input type="checkbox"/> |
|  | 6.2 How much do you trust the following people?                                                                                                                        |                                                             | 1 = No trust             |                          |                          |                          | 5 = High trust           |
|  |                                                                                                                                                                        | Classmates                                                  | <input type="checkbox"/> |
|  |                                                                                                                                                                        | Teachers                                                    | <input type="checkbox"/> |
|  |                                                                                                                                                                        | Caterer at your school                                      | <input type="checkbox"/> |
|  | 6.3 Are you active in a sports club in your free time or do you volunteer for an organization that is committed to environmental protection, culture or social issues? | <input type="checkbox"/> Yes<br><input type="checkbox"/> No |                          |                          |                          |                          |                          |
|  | 6.4 Are there times at home between Monday and Friday where all family members eat together?                                                                           | <input type="checkbox"/> Yes<br><input type="checkbox"/> No |                          |                          |                          |                          |                          |

|  |                                                                                                                             |                                                                          |                          |                          |                          |                          |
|--|-----------------------------------------------------------------------------------------------------------------------------|--------------------------------------------------------------------------|--------------------------|--------------------------|--------------------------|--------------------------|
|  | 6.5 What meals are these and on how many days do you eat them together with your family from Monday to Friday?              |                                                                          | 5 times per week)        | 3-4 times per week       | 1-2 times per week       | Never                    |
|  |                                                                                                                             | Breakfast                                                                | <input type="checkbox"/> | <input type="checkbox"/> | <input type="checkbox"/> | <input type="checkbox"/> |
|  |                                                                                                                             | Afternoon lunch                                                          | <input type="checkbox"/> | <input type="checkbox"/> | <input type="checkbox"/> | <input type="checkbox"/> |
|  |                                                                                                                             | Dinner                                                                   | <input type="checkbox"/> | <input type="checkbox"/> | <input type="checkbox"/> | <input type="checkbox"/> |
|  | 6.6 Here are some statements about eating habits in your family. How much do these statements apply to you and your family? |                                                                          | 1 = Does not apply       | 2                        | 3                        | 4 = Does apply           |
|  |                                                                                                                             | Having dinner together plays a big role in my family                     | <input type="checkbox"/> | <input type="checkbox"/> | <input type="checkbox"/> | <input type="checkbox"/> |
|  |                                                                                                                             | At home, everyone eats whenever they want.                               | <input type="checkbox"/> | <input type="checkbox"/> | <input type="checkbox"/> | <input type="checkbox"/> |
|  |                                                                                                                             | We have a dining table at home and enough seats for every family member. | <input type="checkbox"/> | <input type="checkbox"/> | <input type="checkbox"/> | <input type="checkbox"/> |
|  |                                                                                                                             | We only manage to eat together at home on weekends.                      | <input type="checkbox"/> | <input type="checkbox"/> | <input type="checkbox"/> | <input type="checkbox"/> |
|  | 6.7 Do you speak a language other than German at home?                                                                      | <input type="checkbox"/> Yes<br><input type="checkbox"/> No              |                          |                          |                          |                          |
|  | 6.8 What language do you speak at home other than German?                                                                   |                                                                          |                          |                          |                          |                          |

|  |                                                                     |                                                                                                       |                          |                          |
|--|---------------------------------------------------------------------|-------------------------------------------------------------------------------------------------------|--------------------------|--------------------------|
|  | 6.9 Which of the following statements apply to you and your family? |                                                                                                       | Yes                      | No                       |
|  |                                                                     | I have my own room at home.                                                                           | <input type="checkbox"/> | <input type="checkbox"/> |
|  |                                                                     | Before Corona, my family and I went on vacation at least once a year.                                 | <input type="checkbox"/> | <input type="checkbox"/> |
|  |                                                                     | My cell phone/smartphone is never older than 2 years.                                                 | <input type="checkbox"/> | <input type="checkbox"/> |
|  |                                                                     | I have my own computer/LapTop/tablet.                                                                 | <input type="checkbox"/> | <input type="checkbox"/> |
|  |                                                                     | I have my own games console at home.                                                                  | <input type="checkbox"/> | <input type="checkbox"/> |
|  | 6.9 Do you currently have a valid "berlinpass-BuT"?                 | <input type="checkbox"/> Yes<br><input type="checkbox"/> No<br><input type="checkbox"/> I do not know |                          |                          |
|  | 6.10 Do you use your "berlinpass-BuT" for a warm school lunch?)     | <input type="checkbox"/> Yes<br><input type="checkbox"/> No                                           |                          |                          |

**Supplementary Table S2** Characteristics of participating schools

| <b>Size in number of pupils<br/>(8th-10th grade)</b> | <b>n</b> | <b>%</b> |
|------------------------------------------------------|----------|----------|
| Small (<500)                                         | 11       | 44       |
| Medium (500-1000)                                    | 7        | 28       |
| Large (>1000)                                        | 7        | 28       |
| <b>Total</b>                                         | 25       | 100      |
| <b>Districts</b>                                     |          |          |
| Mitte                                                | 2        | 8        |
| Friedrichshain-Kreuzberg                             | 2        | 8        |
| Pankow                                               | 2        | 8        |
| Charlottenburg-Wilmersdorf                           | 5        | 20       |
| Spandau                                              | 2        | 8        |
| Steglitz-Zehlendorf                                  | 2        | 8        |
| Tempelhof-Schöneberg                                 | 1        | 4        |
| Neukölln                                             | 3        | 12       |
| Treptow-Köpenick                                     | 1        | 4        |
| Marzahn-Hellersdorf                                  | 0        | 0        |
| Lichtenberg                                          | 2        | 8        |
| Reinickendorf                                        | 3        | 12       |
| <b>Total</b>                                         | 25       | 100      |
| <b>All-day operations</b>                            |          |          |
| with mandatory afternoon classes                     | 22       | 88       |
| without mandatory afternoon<br>classes               | 3        | 12       |
| <b>Total</b>                                         | 25       | 100      |

**Supplementary Table S3** Characteristics of survey participants

| <b>Gender</b>      | <b>n</b> | <b>%</b> |
|--------------------|----------|----------|
| Female             | 1353     | 45.2     |
| Male               | 1532     | 51.2     |
| Diverse            | 108      | 3.6      |
| <b>Total</b>       | 2993     | 100      |
| <b>Grade level</b> |          |          |
| 8th grade          | 577      | 19.3     |
| 9th grade          | 1227     | 40.9     |
| 10th grade         | 1193     | 39.8     |
| <b>Total</b>       | 2997     | 100      |
| <b>Birth year</b>  |          |          |
| 2004               | 105      | 3.7      |
| 2005               | 511      | 18       |
| 2006               | 1072     | 37.7     |
| 2007               | 920      | 32.4     |
| 2008               | 233      | 8.2      |
| <b>Total</b>       | 2841     | 100      |

**Supplementary Table S4** COREQ Checklist for the qualitative research  
(Two networking events, three coaching sessions and one cooking workshop)

| Item No.                                       | Guide Questions/Description                                                                                                                | Reporting                                                                                                                                                                           |
|------------------------------------------------|--------------------------------------------------------------------------------------------------------------------------------------------|-------------------------------------------------------------------------------------------------------------------------------------------------------------------------------------|
| <b>Domain 1: Research team and reflexivity</b> |                                                                                                                                            |                                                                                                                                                                                     |
| <i>Personal characteristics</i>                |                                                                                                                                            |                                                                                                                                                                                     |
| 1. Interviewer/facilitator                     | Which authors participated in the events?                                                                                                  | B.H. & M.S.                                                                                                                                                                         |
| 2. Credentials                                 | What were the researcher's credentials?<br>E.g. PhD, MD                                                                                    | B.H.: PhD<br>M.S.: habil.                                                                                                                                                           |
| 3. Occupation                                  | What was their occupation at the time of the study?                                                                                        | B.H.: Postdoc and researcher<br>M.S.: Managing director and principal investigator                                                                                                  |
| 4. Gender                                      | Was the researcher male or female?                                                                                                         | B.H.: male<br>M.S.: female                                                                                                                                                          |
| 5. Experience and training                     | What experience or training did the researcher have?                                                                                       | Both researchers have advanced experiences in conducting qualitative interviews, focus groups and participatory observations                                                        |
| <i>Relationship with participants</i>          |                                                                                                                                            |                                                                                                                                                                                     |
| 6. Relationship established                    | Was a relationship established prior to study commencement?                                                                                | For the school survey, contact was established to some participants prior to the events.                                                                                            |
| 7. Participant knowledge of the interviewer    | What did the participants know about the researcher? e.g. personal goals, reasons for doing the research                                   | The research objectives were communicated to the participants in the invitation letters and at the start of the events.                                                             |
| 8. Interviewer characteristics                 | What characteristics were reported about the interviewer/facilitator? e.g. Bias, assumptions, reasons, and interests in the research topic | The researchers were interested in exploring the acceptance and quality of school meals in secondary schools in Berlin but also in related health and social cohesion implications. |

| <b>Domain 2: Study design</b>            |                                                                                                                                                          |                                                                                                                                                                                                                                                                                      |
|------------------------------------------|----------------------------------------------------------------------------------------------------------------------------------------------------------|--------------------------------------------------------------------------------------------------------------------------------------------------------------------------------------------------------------------------------------------------------------------------------------|
| <i>Theoretical framework</i>             |                                                                                                                                                          |                                                                                                                                                                                                                                                                                      |
| 9. Methodological orientation and Theory | What methodological orientation was stated to underpin the study? e.g. grounded theory, discourse analysis, ethnography, phenomenology, content analysis | The study was based on the interpretative paradigm of qualitative research. A combination of inductive and deductive coding was used for the analysis.                                                                                                                               |
| <i>Participant selection</i>             |                                                                                                                                                          |                                                                                                                                                                                                                                                                                      |
| 10. Sampling                             | How were participants selected? e.g. purposive, convenience, consecutive, snowball                                                                       | All schools that participated in the survey were invited to take part in the events. From these schools we aimed to invite all relevant stakeholders involved in the task of school catering (e.g. municipal school authorities, principals, teachers, caterers, parents and pupils) |
| 11. Method of approach                   | How were participants approached? e.g. face-to-face, telephone, mail, email                                                                              | The schools were approached via email by the Networking Center for School Catering (NCSC)                                                                                                                                                                                            |
| 12. Sample size                          | How many participants were in the study?                                                                                                                 | First networking event: 8 participants; second networking event: 34 participants; first coaching session: 9 participants; second coaching session: 6 participants; third coaching session: 7 participants; cooking workshop: 5 participants                                          |
| 13. Non-participation                    | How many people refused to participate or dropped out? Reasons?                                                                                          | Most schools invited did not participate in the events due to high work load and limited capacities.                                                                                                                                                                                 |
| <i>Setting</i>                           |                                                                                                                                                          |                                                                                                                                                                                                                                                                                      |
| 14. Setting of data collection           | Where was the data collected? e.g. home, clinic, workplace                                                                                               | Data was collected in a seminar room at the Center for Technology and Society as well as online (Networking events), in three schools and in a training kitchen of the "Kantine Zukunft Berlin".                                                                                     |

|                                  |                                                                                   |                                                                                                                                                                                                                                               |
|----------------------------------|-----------------------------------------------------------------------------------|-----------------------------------------------------------------------------------------------------------------------------------------------------------------------------------------------------------------------------------------------|
| 15. Presence of non-participants | Was anyone else present besides the participants and researchers?                 | In the networking events and the coaching sessions, the NCSC gave input and moderated the follow-up discussion. The workshop was held by a professional cook. A representative of the NCSC was also present but did not actively participate. |
| 16. Description of sample        | What are the important characteristics of the sample? e.g. demographic data, date | Demographic data was not inquired. The participants were selected according to their function. For instance, principals, teachers, caterers, representatives from the municipal school authorities, pupils and parents                        |
| <i>Data collection</i>           |                                                                                   |                                                                                                                                                                                                                                               |
| 17. Interview guide              | Were questions, prompts, guides provided by the authors? Was it pilot tested?     | Interview guidelines were not used. The events were planned according to a program which was intended to give the participants the space for an open discussion.                                                                              |
| 18. Repeat interviews            | Were repeat interviews carried out? If yes, how many?                             | No                                                                                                                                                                                                                                            |
| 19. Audio/visual recording       | Did the research use audio or visual recording to collect the data?               | No                                                                                                                                                                                                                                            |
| 20. Field notes                  | Were field notes made during and/or after the interview or focus group?           | Researchers made field notes during the events. Meeting minutes were written afterwards.                                                                                                                                                      |
| 21. Duration                     | What was the duration of the inter views or focus group?                          | First networking event: two hours; second networking event: three hours and thirty minutes; all coaching sessions: two hours; cooking workshop: eight hours and thirty minutes                                                                |
| 22. Data saturation              | Was data saturation discussed?                                                    | Data saturation was not discussed. However, the validity of data collection was improved by discussing key findings with the NCSC. This association has many years of experiences in the field of Berlin school catering                      |



|                                        |                                                                                                                                 |                                                                                                                  |
|----------------------------------------|---------------------------------------------------------------------------------------------------------------------------------|------------------------------------------------------------------------------------------------------------------|
| 23. Transcripts returned               | Were transcripts returned to participants for comment and/or correction                                                         | Findings and drawn conclusions were discussed with the NCSC.                                                     |
| <b>Domain 3: analysis and findings</b> |                                                                                                                                 |                                                                                                                  |
| <i>Data analysis</i>                   |                                                                                                                                 |                                                                                                                  |
| Number of data coders                  | How many data coders coded the data?                                                                                            | The data was coded by B.H. The findings were later discussed together with M.S. and our practice partners.       |
| Description of the coding tree         | Did authors provide a description of the coding tree?                                                                           | No                                                                                                               |
| Derivation of themes                   | Were themes identified in advance or derived from the data?                                                                     | Themes were derived from the data in an inductive manner.                                                        |
| Software                               | What software, if applicable, was used to manage the data?                                                                      | No software was used for the coding                                                                              |
| Participant checking                   | Did participants provide feedback on the findings?                                                                              | Findings were discussed with our practice partners.                                                              |
| <i>Reporting</i>                       |                                                                                                                                 |                                                                                                                  |
| Quotations presented                   | Were participant quotations presented to illustrate the themes/findings? Was each quotation identified? e.g. participant number | Main findings are derived from the minutes of events. Quotations are identified by participant number and event. |
| Data and findings consistent           | Was there consistency between the data presented and the findings?                                                              | Findings were supported by key themes.                                                                           |
| Clarity of major themes                | Were major themes clearly presented in the findings?                                                                            | Key themes are presented in the findings and discussion section.                                                 |
| Clarity of minor themes                | Is there a description of diverse cases or discussion of minor themes?                                                          | Due to the article length and format requirements, minor themes could not be included in the findings.           |

Source: Tong A, Sainsbury P, Craig J. Consolidated criteria for reporting qualitative research (COREQ): a 32-item checklist for interviews and focus groups. *International Journal for Quality in Health Care*. 2007. 19 (6), 349 – 357.

**Supplementary Table S5** Frequency of participation in warm school lunch (if available)

| How often do you eat warm lunch at school | Never | Less often | 1-2 times per week | 3-4 times per week | Daily | Total |
|-------------------------------------------|-------|------------|--------------------|--------------------|-------|-------|
| n                                         | 1742  | 321        | 139                | 165                | 243   | 2610  |
| %                                         | 66.7  | 12.3       | 5.3                | 6.3                | 9.3   | 100   |

**Supplementary Table S6** Reasons for never or rarely eating a warm lunch at school (multiple answers)

| Why do you never or rarely eat at school? Please select all answers that apply (n = 2644) | n   | %    |
|-------------------------------------------------------------------------------------------|-----|------|
| Because I prefer to eat dinner at home.                                                   | 611 | 23.1 |
| Because I do not like the taste of the food.                                              | 585 | 22.1 |
| Because the price is too high for me and my parents.                                      | 320 | 12.1 |
| Because the lunchbreak is too short.                                                      | 491 | 18.6 |
| Because I prefer to eat with my friends outside of school.                                | 260 | 9.8  |
| Because I prefer to buy something from the kiosk/vending machine.                         | 402 | 15.2 |
| Because the lunchroom is not appealing.                                                   | 208 | 7.9  |
| Because of little variety in food/small menu.                                             | 235 | 8.9  |
| Because the food contains too many calories and fat.                                      | 99  | 3.7  |
| Because my friends do not eat at school.                                                  | 342 | 12.9 |
| Because I bring my food from home.                                                        | 568 | 21.5 |
| Because I feel overly supervised by teachers.                                             | 215 | 8.1  |
| Because the food does not fit into my personal diet.                                      | 158 | 6    |
| Because I am not particularly hungry at noon.                                             | 355 | 13.4 |
| Because the portion size is too small                                                     | 173 | 6.5  |
| Because the portion size is too large                                                     | 10  | .3   |

**Supplementary Table S7** Satisfaction with the food and the lunchroom

| How satisfied are you with the following aspects of the school lunch? | 1 = not satisfied | 2    | 3    | 4    | 5 = very satisfied | Total |
|-----------------------------------------------------------------------|-------------------|------|------|------|--------------------|-------|
| <b>Taste</b>                                                          |                   |      |      |      |                    |       |
| n                                                                     | 95                | 164  | 284  | 225  | 97                 | 865   |
| %                                                                     | 11                | 19   | 32.8 | 26   | 11.2               | 100   |
| <b>Temperature</b>                                                    |                   |      |      |      |                    |       |
| n                                                                     | 87                | 158  | 252  | 241  | 128                | 866   |
| %                                                                     | 10                | 18.2 | 29.1 | 27.8 | 14.8               | 100   |
| <b>Food presentation</b>                                              |                   |      |      |      |                    |       |
| n                                                                     | 97                | 198  | 285  | 196  | 88                 | 864   |
| %                                                                     | 11.2              | 22.9 | 33   | 22.7 | 10.2               | 100   |
| <b>Menu</b>                                                           |                   |      |      |      |                    |       |
| n                                                                     | 141               | 212  | 263  | 164  | 87                 | 867   |
| %                                                                     | 16.3              | 24.5 | 30.3 | 18.9 | 10                 | 100   |
| <b>Length of lunch break</b>                                          |                   |      |      |      |                    |       |
| n                                                                     | 229               | 152  | 222  | 135  | 123                | 861   |
| %                                                                     | 26.6              | 17.7 | 25.8 | 15.7 | 14.3               | 100   |
| <b>Meal ordering system</b>                                           |                   |      |      |      |                    |       |
| n                                                                     | 110               | 162  | 253  | 197  | 134                | 856   |
| %                                                                     | 12.9              | 18.9 | 29.6 | 23   | 15.7               | 100   |
| <b>Service workers</b>                                                |                   |      |      |      |                    |       |
| n                                                                     | 91                | 119  | 183  | 188  | 281                | 862   |
| %                                                                     | 10.6              | 13.8 | 21.2 | 21.8 | 32.6               | 100   |
| <b>Noise level</b>                                                    |                   |      |      |      |                    |       |
| n                                                                     | 202               | 217  | 259  | 135  | 49                 | 862   |
| %                                                                     | 23.4              | 25.2 | 30   | 15.7 | 5.7                | 100   |
| <b>Available seating</b>                                              |                   |      |      |      |                    |       |
| n                                                                     | 134               | 202  | 268  | 162  | 95                 | 861   |
| %                                                                     | 15.6              | 23.5 | 31.1 | 18.8 | 11                 | 100   |
| <b>Cleanliness</b>                                                    |                   |      |      |      |                    |       |
| n                                                                     | 124               | 183  | 270  | 188  | 98                 | 863   |
| %                                                                     | 14.4              | 21.2 | 31.3 | 21.8 | 11.4               | 100   |
| <b>Comfort</b>                                                        |                   |      |      |      |                    |       |
| n                                                                     | 152               | 222  | 288  | 126  | 70                 | 858   |
| %                                                                     | 17.7              | 25.9 | 33.6 | 14.7 | 8.2                | 100   |

**Supplementary Table S8 Eating warm school lunch**

| Which of the following statements apply to you eating school lunch?                                  | Disagree | Rather disagree | Rather agree | Agree | Total |
|------------------------------------------------------------------------------------------------------|----------|-----------------|--------------|-------|-------|
| <b>We eat lunch together with the class</b>                                                          |          |                 |              |       |       |
| n                                                                                                    | 556      | 146             | 107          | 88    | 897   |
| %                                                                                                    | 62       | 16.3            | 11.9         | 9.8   | 100   |
| <b>I only eat lunch with my friends</b>                                                              |          |                 |              |       |       |
| n                                                                                                    | 134      | 109             | 272          | 384   | 899   |
| %                                                                                                    | 14.9     | 12.1            | 30.3         | 42.7  | 100   |
| <b>The school lunch is an opportunity for me to talk to other pupils that I do not know so well.</b> |          |                 |              |       |       |
| n                                                                                                    | 322      | 271             | 209          | 91    | 893   |
| %                                                                                                    | 36.1     | 30.3            | 23.4         | 10.2  | 100   |

**Supplementary Table S9 Opportunities to participate in school lunch**

| Are you involved in the school lunch / menu planning? | Yes | No   | Total |
|-------------------------------------------------------|-----|------|-------|
| n                                                     | 156 | 2326 | 2482  |
| %                                                     | 6.3 | 93.7 | 100   |

**Supplementary Table S10 Pupils' interests in participation opportunities**

| Would you be interested in the following activities and participation opportunities? | 1 = Not interested | 2    | 3    | 4    | 5 = Very interested | Total |
|--------------------------------------------------------------------------------------|--------------------|------|------|------|---------------------|-------|
| <b>Decorating the lunchroom</b>                                                      |                    |      |      |      |                     |       |
| n                                                                                    | 610                | 407  | 795  | 372  | 348                 | 2532  |
| %                                                                                    | 24.1               | 16.1 | 31.4 | 14.7 | 13.7                | 100   |
| <b>Giving feedback to the caterer</b>                                                |                    |      |      |      |                     |       |
| n                                                                                    | 537                | 359  | 829  | 427  | 358                 | 2510  |
| %                                                                                    | 21.4               | 14.3 | 33   | 17   | 14.3                | 100   |
| <b>Voting for favorite meals</b>                                                     |                    |      |      |      |                     |       |
| n                                                                                    | 459                | 302  | 632  | 473  | 646                 | 2512  |
| %                                                                                    | 18.3               | 12.0 | 25.2 | 18.8 | 25.7                | 100   |
| <b>Test-tasting activities</b>                                                       |                    |      |      |      |                     |       |
| n                                                                                    | 658                | 421  | 746  | 331  | 354                 | 2510  |
| %                                                                                    | 26.2               | 16.8 | 29.7 | 13.2 | 14.1                | 100   |
| <b>Workshops on healthy and sustainable food</b>                                     |                    |      |      |      |                     |       |
| n                                                                                    | 902                | 537  | 630  | 244  | 209                 | 2522  |
| %                                                                                    | 35.8               | 21.3 | 25   | 9.7  | 8.3                 | 100   |
| <b>Participating in official school committees</b>                                   |                    |      |      |      |                     |       |
| n                                                                                    | 584                | 433  | 818  | 388  | 294                 | 2517  |
| %                                                                                    | 23.2               | 17.2 | 32.5 | 15.4 | 11.7                | 100   |
| <b>Involvement in a company run by pupils</b>                                        |                    |      |      |      |                     |       |
| n                                                                                    | 761                | 518  | 783  | 269  | 176                 | 2507  |
| %                                                                                    | 30.4               | 20.7 | 31.2 | 10.7 | 7                   | 100   |

**Supplementary Table S11** Trust in the caterer

| How much do you trust your caterer at school? | 1 = No trust | 2    | 3    | 4   | 5 = High trust | Total |
|-----------------------------------------------|--------------|------|------|-----|----------------|-------|
| <b>n</b>                                      | 882          | 505  | 642  | 274 | 179            | 2482  |
| <b>%</b>                                      | 35.5         | 20.3 | 25.9 | 11  | 7.2            | 100   |

**Supplementary Table S12**"berlinpass-BuT"

| Do you currently have a valid "berlinpass-BuT"?            | Yes  | No   | Total |
|------------------------------------------------------------|------|------|-------|
| <b>n</b>                                                   | 707  | 1196 | 1903  |
| <b>%</b>                                                   | 37.2 | 62.8 | 100   |
| Do you use your "berlinpass-BuT" for a warm school lunch?) | Yes  | No   | Total |
| <b>n</b>                                                   | 281  | 418  | 699   |
| <b>%</b>                                                   | 40.2 | 59.8 | 100   |
